# Supplementary material
Source: MDPI journal article supplement (https://www.mdpi.com/2071-1050/8/12/1313)
Supplement: s1 [file s1]

# Supplementary Materials: Examining the Interrelationship among Critical Success Factors of Public Private Partnership Infrastructure Projects

Shiying Shi, Heap-Yih Chong, Lihong Liu and Xiaosu Ye

Table S1. Sample Questionnaire.

| Part 1. Basic Information                                                                                                                                                                                                                   |                                                       |   |   |   |   |   |
|---------------------------------------------------------------------------------------------------------------------------------------------------------------------------------------------------------------------------------------------|-------------------------------------------------------|---|---|---|---|---|
| (Please circle the appropriate number for each choice that best reflects your information)                                                                                                                                                  |                                                       |   |   |   |   |   |
| (1) Education level: a. Diploma; b. Bachelor's degree; c. Master's degree; d. PHD; e. Others                                                                                                                                                |                                                       |   |   |   |   |   |
| (2) Organization nature: a. Public sector; b. Private sector; c. Research institutions; d. The public                                                                                                                                       |                                                       |   |   |   |   |   |
| (3) Years of experience: a. ≤5 years; b. 6–10 years; c. 11–15 years; d. ≥16 years                                                                                                                                                           |                                                       |   |   |   |   |   |
| Part 2. The Critical Success Factor for PPP Project                                                                                                                                                                                         |                                                       |   |   |   |   |   |
| Please circle the appropriate number for each choice that best reflects the degree of importance of the following 29 factors in PPP project success (5—extremely important, 4—important, 3—neutral, 2—unimportant, 1—extremely unimportant) |                                                       |   |   |   |   |   |
| X1                                                                                                                                                                                                                                          | Reasonable government supervision                     | 1 | 2 | 3 | 4 | 5 |
| X2                                                                                                                                                                                                                                          | Government willing                                    | 1 | 2 | 3 | 4 | 5 |
| X3                                                                                                                                                                                                                                          | Clear cooperation department                          | 1 | 2 | 3 | 4 | 5 |
| X4                                                                                                                                                                                                                                          | Government's capabilities of fulfilling the contract  | 1 | 2 | 3 | 4 | 5 |
| X5                                                                                                                                                                                                                                          | Government's capabilities of administrative execution | 1 | 2 | 3 | 4 | 5 |
| X6                                                                                                                                                                                                                                          | Standardization procedure for PPP projects            | 1 | 2 | 3 | 4 | 5 |
| X7                                                                                                                                                                                                                                          | Firm's capabilities of fulfilling the contract        | 1 | 2 | 3 | 4 | 5 |
| X8                                                                                                                                                                                                                                          | Firm's financial abilities                            | 1 | 2 | 3 | 4 | 5 |
| X9                                                                                                                                                                                                                                          | Firm's information disclosure reasonably and timely   | 1 | 2 | 3 | 4 | 5 |
| X10                                                                                                                                                                                                                                         | Firm's PPP project experience                         | 1 | 2 | 3 | 4 | 5 |
| X11                                                                                                                                                                                                                                         | Firm's profit expectations                            | 1 | 2 | 3 | 4 | 5 |
| X12                                                                                                                                                                                                                                         | Public opinion                                        | 1 | 2 | 3 | 4 | 5 |
| X13                                                                                                                                                                                                                                         | Public satisfaction                                   | 1 | 2 | 3 | 4 | 5 |
| X14                                                                                                                                                                                                                                         | The level of public recognition                       | 1 | 2 | 3 | 4 | 5 |
| X15                                                                                                                                                                                                                                         | Favorable legal framework                             | 1 | 2 | 3 | 4 | 5 |
| X16                                                                                                                                                                                                                                         | Stable macro-economic environment                     | 1 | 2 | 3 | 4 | 5 |
| X17                                                                                                                                                                                                                                         | Sound economic policy                                 | 1 | 2 | 3 | 4 | 5 |
| X18                                                                                                                                                                                                                                         | Complete PPP guidelines                               | 1 | 2 | 3 | 4 | 5 |
| X19                                                                                                                                                                                                                                         | Clear project scope definition and documentation      | 1 | 2 | 3 | 4 | 5 |
| X20                                                                                                                                                                                                                                         | Government financial guarantee                        | 1 | 2 | 3 | 4 | 5 |
| X21                                                                                                                                                                                                                                         | Political support                                     | 1 | 2 | 3 | 4 | 5 |
| X22                                                                                                                                                                                                                                         | Available financial and capital market                | 1 | 2 | 3 | 4 | 5 |
| X23                                                                                                                                                                                                                                         | Project complexity                                    | 1 | 2 | 3 | 4 | 5 |
| X24                                                                                                                                                                                                                                         | Concession period                                     | 1 | 2 | 3 | 4 | 5 |
| X25                                                                                                                                                                                                                                         | Appropriate risk allocation                           | 1 | 2 | 3 | 4 | 5 |
| X26                                                                                                                                                                                                                                         | Effective management for cost, time and quality       | 1 | 2 | 3 | 4 | 5 |
| X27                                                                                                                                                                                                                                         | Reasonable services price                             | 1 | 2 | 3 | 4 | 5 |
| X28                                                                                                                                                                                                                                         | Effective contract management                         | 1 | 2 | 3 | 4 | 5 |
| X29                                                                                                                                                                                                                                         | Policies and conditions for asset transfer            | 1 | 2 | 3 | 4 | 5 |
